# Supplementary material for: A multifunctional ligand for defect passivation of perovskite film realizes air-stable perovskite solar cells with efficiencies exceeding 20%
Source: Royal Society of Chemistry journal article supplement (doi:10.1039/d1se01892b), 2022-01-01
Supplement: d1se01892b1.pdf [file d1se01892b1.pdf]

## A multifunctional ligand for defect passivation of perovskite film realizes air-stable perovskite solar cells with efficiencies exceeding 20%

Zhong-En Shi,<sup>a</sup> Jian-Yu Long,<sup>b</sup> Chia-Wei Li,<sup>c</sup> Sheng-Yan Hsieh,<sup>b</sup> Yu-Sheng Hsiao,<sup>c</sup> Chih-Ping Chen,<sup>\*b</sup> Yuan-Hsiang Yu<sup>\*a</sup>

<sup>a</sup> Department of Chemistry, Fu Jen Catholic University, New Taipei City 24205, Taiwan

<sup>b</sup> Department of Materials Engineering, Ming Chi University of Technology, New Taipei City, Taiwan.

<sup>c</sup> Department of Materials Science and Engineering, National Taiwan University of Science and Technology, No. 43, Sec. 4, Keelung Road, Da-an District, Taipei, 10607, Taiwan, ROC

\*Corresponding authors.

E-mail addresses: [084916@mail.fju.edu.tw](mailto:084916@mail.fju.edu.tw) (Y.-H. Yu); [cpchen@mail.mcut.edu.tw](mailto:cpchen@mail.mcut.edu.tw) (C.P. Chen)

### Experimental

#### Characterization

X-ray photoelectron spectroscopy (XPS) was performed using a ULVAC-PHI PHI 5000 Versaprobe II spectrometer and a monochromatic Al K $\alpha$  source. Scanning electron microscopy (SEM) images were recorded using a JSM-7000F microscope. Energy dispersive spectrometry (EDS) was used to determine the presence of elements. Crystallinity information was obtained using a Panalytical Empyrean X-ray diffractometer and CuK $\alpha$  radiation ( $\lambda = 0.1542$  nm). Absorption spectra were recorded using a JASCO V-650 spectrometer. TRPL spectra were recorded using a time-correlated single photon counting spectrometer (WELLS-001 FX, DongWoo Optron); the pulse laser had a wavelength of 440 nm and an average power of 1 mW; it was operated with a duration of excitation of 2  $\mu$ s. PL spectra were recorded using a FluroMax-4 HORIBA spectrometer with an excitation wavelength of 550 nm. Device performance data were measured inside a glove box. The current–voltage ( $I$ – $V$ ) properties of the devices were measured using a computer-controlled Keithley 2400 source measurement unit (SMU) and a Dyesol simulator (AAA Class Solar Simulators) under AM 1.5 illumination (1000 W/m<sup>2</sup>); the illumination intensity was calibrated using a standard Si reference cell and a KG-5 filter. EQE spectra were recorded by using an Enlitech QE-R spectral response measurement system to calibrate the current densities of the devices. Electrochemical impedance spectroscopy (EIS) was performed using an electrochemical workstation (IM6, Zahner) over the frequency range from 1 MHz to 1 Hz, with an amplitude of 20 mV, under dark conditions; the EIS curves were fitted with Z-view software based on the electronic circuit model.

## Materials

Dimethyl sulfoxide (DMSO, Sigma–Aldrich), N,N-dimethylformamide (DMF, Arcos Organics), lead iodide (Alfa Aesar), methylammonium iodide (Sigma–Aldrich), 6,6'-dithiodinicotinic acid (TCl), nickel(II) acetylacetonate, EtOH (ECHO), bathocuproine (BCP, Aldrich), PC<sub>61</sub>BM (Nano-C), and urea (J. T. Baker) were used as received

## Fabrication of PSCs

Indium tin oxide (ITO) substrates were pre-cleaned in an ultrasonic bath, sequentially with detergent aqueous solution, deionized water, acetone, and isopropyl alcohol, for 20 min each, then dried under a stream of N<sub>2</sub>. To manufacture inverted perovskite solar cells having the architecture ITO/NiO<sub>x</sub>/perovskite/PCBM/BCP/Ag, NiO<sub>x</sub> films were prepared by spin-coating (5000 rpm, 30 s) a solution containing the NiO<sub>x</sub> precursor onto plasma-treated ITO and then baking first at 250 °C for 30 min and then at 300 °C for 6 min. The NiO<sub>x</sub> precursor solution was prepared by dissolving nickel acetylacetonate (55 mg) in EtOH (2.5 mL) containing 1% HCl as a stabilizer. The ITO/NiO<sub>x</sub> substrates were transferred to an Ar-filled glove box for preparation of the perovskite films. A 1.4 M solution of the perovskite precursor was prepared by dissolving PbI<sub>2</sub> and MAI at a molar ratio of 1:1 in a mixture of DMF and DMSO (4:1, v/v). To obtain the additive-included perovskite films, an additive (urea and/or dtdn) was added to the perovskite precursor solution. The urea-incorporated perovskites were prepared by directly adding 1% urea solution into the perovskite precursor. To obtain the dtdn-incorporated perovskites, the perovskite precursor was first prepared (with or without urea) and then a 1, 3, or 5 vol % solution of dtdn (0.05 M in DMF) was added into the precursor solution. The normal perovskite precursor, the precursor with urea, or the precursor with dtdn was spin-coated onto the substrate in a two-step manner: first at 2000 rpm for 10 s and then at 4000 rpm for 22 s. During the second step, toluene (0.3 mL) was added dropwise onto the spinning substrate; the system was then annealed at 100 °C for 10 min. A solution of PC<sub>61</sub>BM in chlorobenzene (20 mg/mL) was spin-coated (2000 rpm, 30 s) onto the perovskite layer. A solution of BCP in isopropyl alcohol was spin-coated (6000 rpm, 10 s) onto the PC<sub>61</sub>BM layer. Finally, the devices were completed by evaporating Ag (100 nm) in a vacuum chamber; the active area of this electrode was fixed at 10 mm<sup>2</sup>.

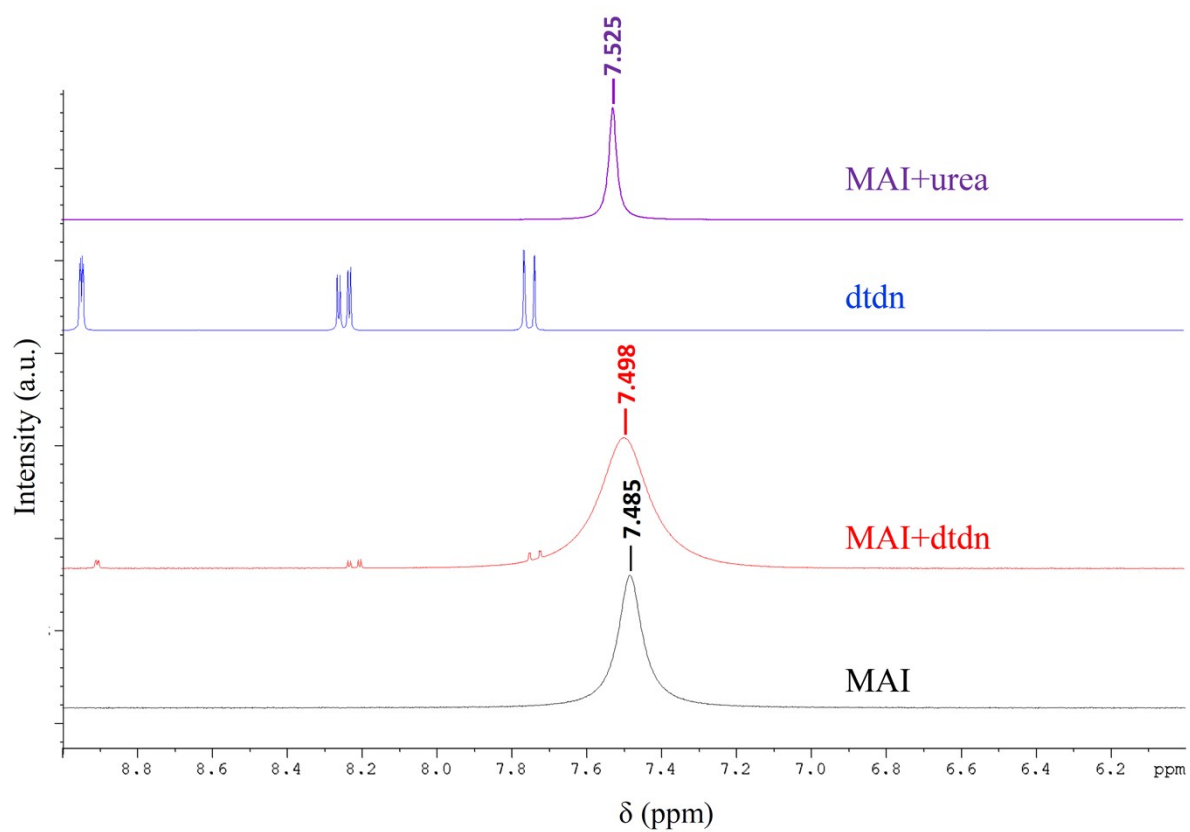

**Figure S1.** NMR spectra of MAI, MAI/dtdn, dtdn, and MAI/urea.

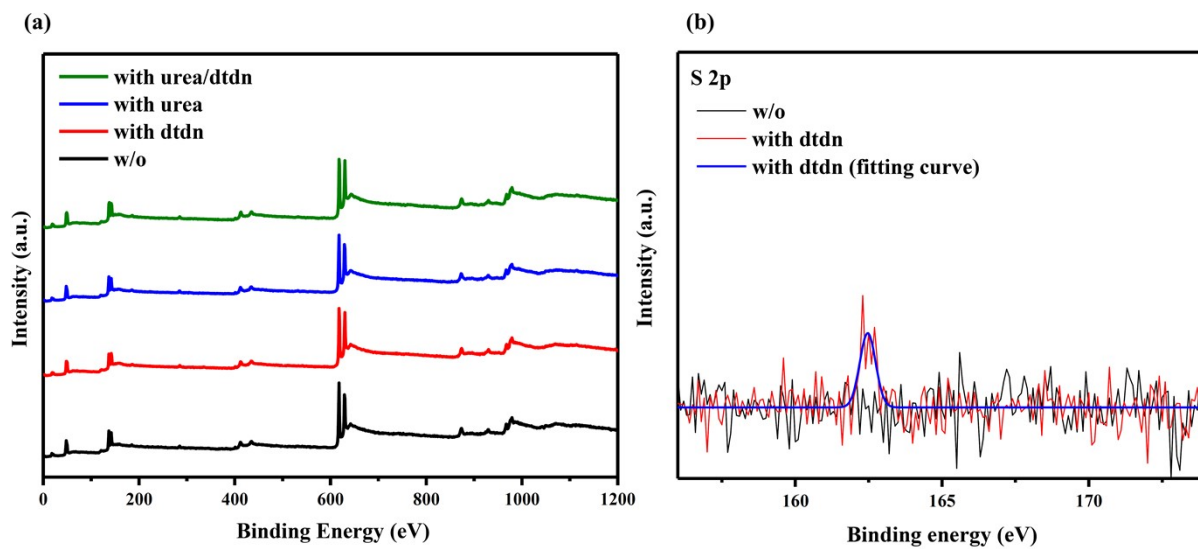

**Figure S2.** XPS spectra displaying the (a) Full-scale regions of perovskite films prepared with dtdn or urea and (b) S 2p regions of perovskite films prepared with dtdn.

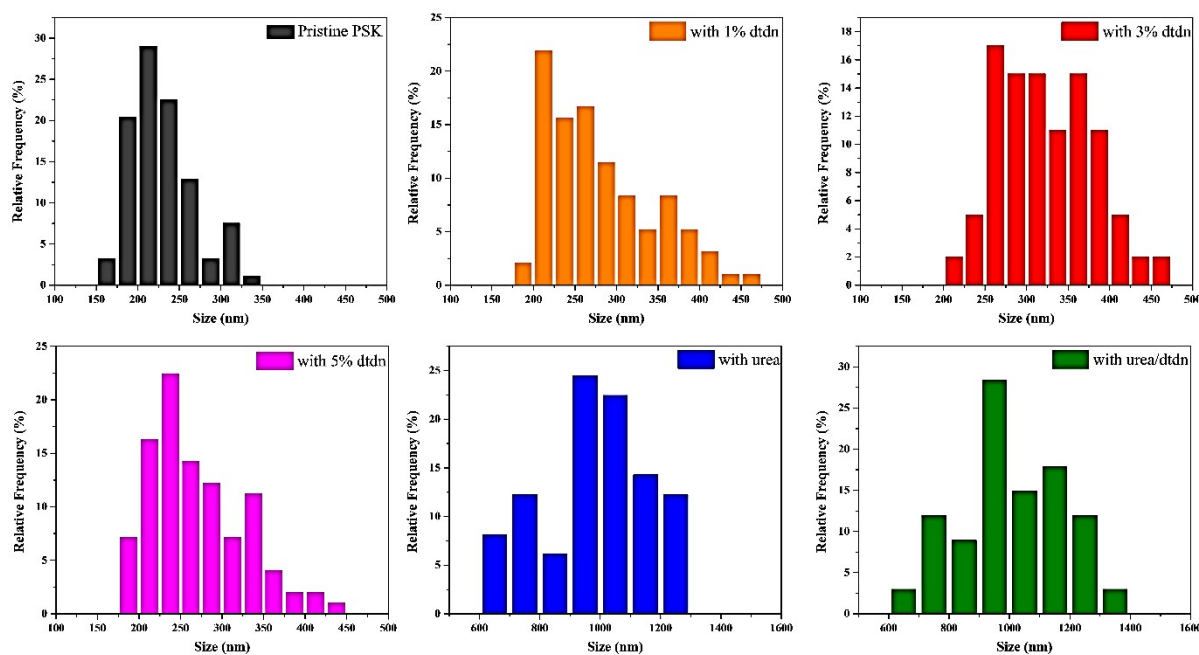

**Figure S3.** Statistical analysis in grain size of SEM images of perovskite with and w/o additives

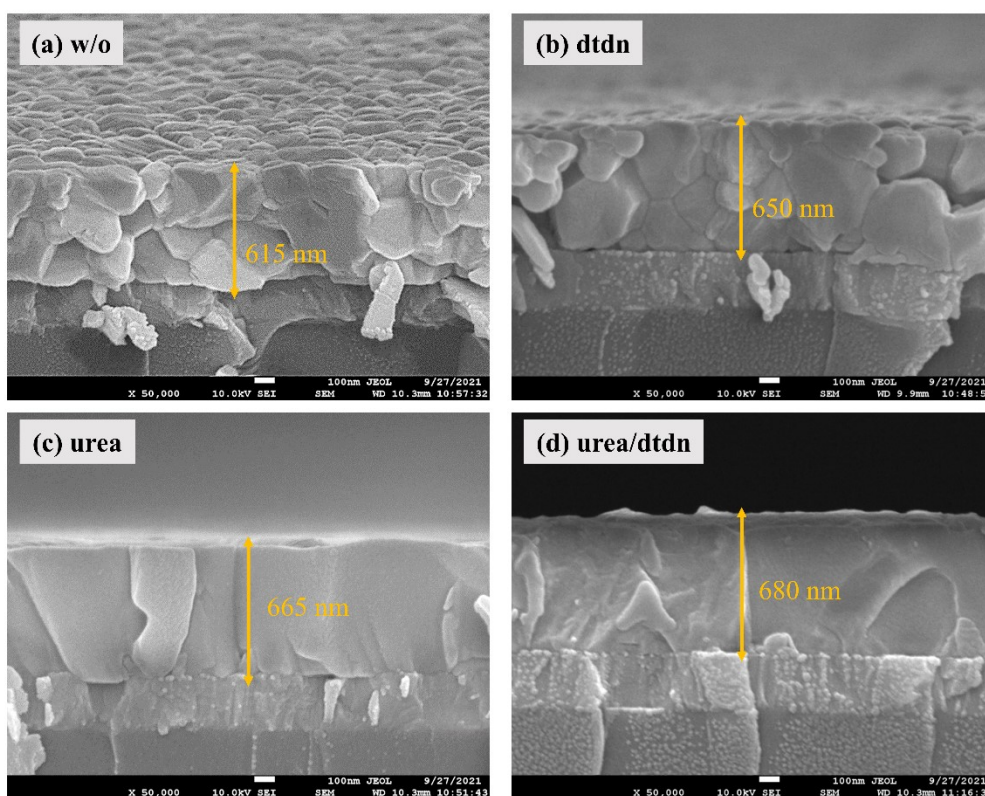

**Figure S4.** Cross-sectional SEM images of the (a) pristine perovskite film and (b–d) perovskite layers prepared with (b) 3% dtdn, (c) urea, and (d) urea/dtdn. (The scale bars are 100 nm).

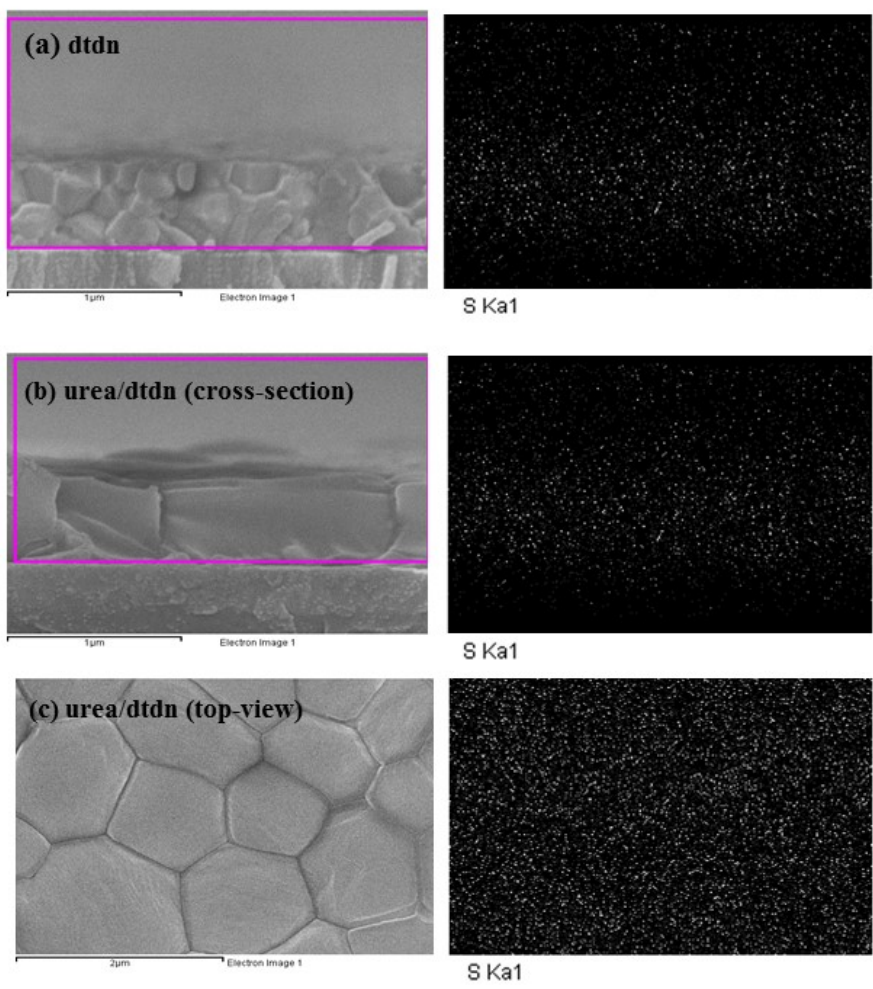

**Figure S5.** (a, b) Cross-sectional SEM images and sulfur element mapping of perovskite films prepared with (a) dtdn and (b) urea/dtdn. (c) Top-view SEM images and sulfur element mapping of the perovskite film prepared with urea/dtdn.

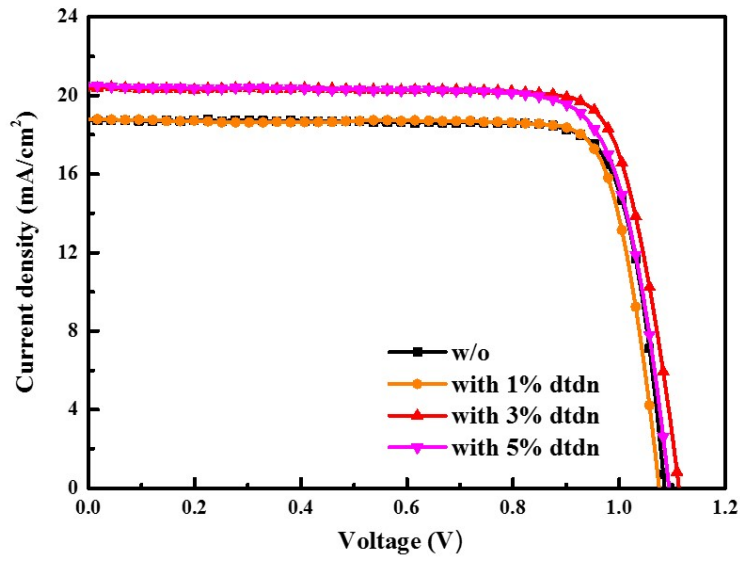

**Figure S6.** *J*–*V* characteristic of PSCs incorporating perovskite films prepared with dtdn at various concentrations.

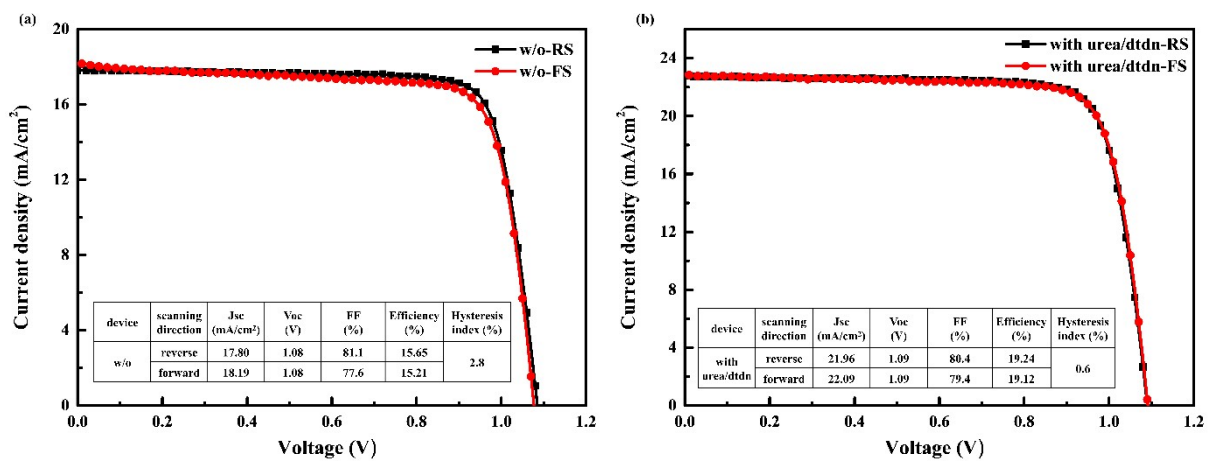

**Figure S7.** *J*–*V* curves and parameters obtained in forward and reverse scans of the pristine and optimal devices.

**Table S1.** Ambient stabilities of recently reported inverted PSCs.

| Device configuration                                                                                                                 | Pristine PCE (%) | Modified PCE (%) | Ambient Stability                                                                                        | Ref.         |
|--------------------------------------------------------------------------------------------------------------------------------------|------------------|------------------|----------------------------------------------------------------------------------------------------------|--------------|
| ITO/NiOx/MAPbI <sub>3</sub> /PCBM/<br>BCP/Ag                                                                                         | 16.76            | 20.64            | 94% stable after 720h<br>(30 days) (40% RH)                                                              | This<br>work |
| ITO/NiOx/Cs <sub>0.175</sub> FA <sub>0.750</sub> MA<br>0.075Pb(I <sub>0.880</sub> Br <sub>0.120</sub> ) <sub>3</sub><br>/PCBM/ZnO/Ag | 17.37            | 19.01            | 72% stable after 60<br>days (in air,30%-40%<br>RH) and 36% stable<br>after 104 days (air,<br>50%-60% RH) | 1            |
| ITO/PTAA/FA <sub>0.8</sub> MA <sub>0.2</sub> Pb(I <sub>0.</sub><br>8Br <sub>0.2</sub> ) <sub>3</sub> /PCBM/ZnO/Ag                    | 18.3             | 21.5             | 82.8% stable after 1700<br>h (40% RH)                                                                    | 2            |
| ITO/NiOx/Perovskite/<br>PCBM+C <sub>60</sub> /BCP/Cr/Au                                                                              | 18.62            | 22.1             | 93% stable after 6000 h<br>(40% RH)                                                                      | 3            |
| FTO/NiOx/MAPbI <sub>3</sub> /PCBM/<br>BCP/Ag                                                                                         | 18.52            | 20.43            | 86% stable after 30<br>days (30% RH)                                                                     | 4            |
| FTO/NiOx/Perovskite/<br>PCBM/Rhodamine101/Ag                                                                                         | 13.6             | 19.06            | 80% stable after 1000 h<br>(30%-40% RH)                                                                  | 5            |
| ITO/NiOx/FA <sub>0.85</sub> MA <sub>0.15</sub> PbI <sub>2.</sub><br>55Br <sub>0.45</sub> /Nb <sub>2</sub> O <sub>5</sub> /Ag         | 18.28            | 20.41            | 90% stable after 60<br>days (55±10% RH)                                                                  | 6            |
| ITO/HTM/(exMMT/<br>MAPbI <sub>3</sub> )/PCBM/PEI/Ag                                                                                  | 16.65            | 17.29            | Almost zero loss after<br>4680 h (ambient)                                                               | 7            |
| ITO/PTAA/BDAl/Perovskit<br>e/PCBM/BCP/Ag                                                                                             | 20.09            | 22.31            | 87% stable after 850 h<br>(20% RH)                                                                       | 8            |

**Table S2.** FWHMs and intensities of the XRD spectral signals at a value of  $2\theta$  of  $14^\circ$  corresponding to the (110) plane.

| sample         | FWHM (degree) | Intensity (a.u.) |
|----------------|---------------|------------------|
| w/o            | 0.493         | 3028             |
| 1% dtdn        | 0.476         | 4319             |
| 3% dtdn        | 0.473         | 4681             |
| 5% dtdn        | 0.489         | 3531             |
| with urea      | 0.463         | 7090             |
| with urea/dtdn | 0.446         | 7966             |

**Table S3.** Fitting parameters for the bi-exponential decay function of the TRPL spectral data of perovskite films prepared with various additives.

| sample         | $\tau_1$ ( $A_1$ ) | $\tau_2$ ( $A_2$ ) | $\tau_{\text{average}}$ |
|----------------|--------------------|--------------------|-------------------------|
| w/o            | 5.18 ns (27.1%)    | 46.25 ns (72.9%)   | 35.138 ns               |
| With dtdn      | 4.76 ns (26.4%)    | 47.10 ns (73.6%)   | 35.925 ns               |
| With urea      | 14.31 ns (21.4%)   | 51.73 ns (78.6%)   | 43.733 ns               |
| With urea/dtdn | 20.23 ns (27.3%)   | 60.81 ns (72.7%)   | 49.741 ns               |

**Table S4.** Fitted EIS parameters of PSCs incorporating perovskite films prepared with various additives.

| Device (additives) | $R_s$ ( $\Omega$ ) | $R_{\text{rec}}$ ( $\Omega$ ) | CPE(F)                |
|--------------------|--------------------|-------------------------------|-----------------------|
| w/o                | 17.15              | 2229                          | $1.131 \cdot 10^{-8}$ |
| with dtdn          | 6.24               | 4448                          | $1.074 \cdot 10^{-8}$ |
| with urea          | 8.44               | 4672                          | $1.026 \cdot 10^{-8}$ |
| with urea/dtdn     | 6.97               | 5916                          | $7.832 \cdot 10^{-9}$ |

**Table S5.** Parameters of J–V performance of urea-derived PSCs incorporating perovskite films prepared with dtdn at various concentrations.

| Sample (additives) | $J_{\text{SC}}$ (mA/cm <sup>2</sup> ) | $V_{\text{OC}}$ (V) | FF (%) | Efficiency (%) |
|--------------------|---------------------------------------|---------------------|--------|----------------|
| with urea/ 1% dtdn | 21.11                                 | 1.08                | 80.7   | 18.37          |
| with urea/ 5% dtdn | 20.83                                 | 1.08                | 78.6   | 17.66          |
| with urea/ 7% dtdn | 20.22                                 | 1.06                | 77.4   | 16.56          |



## References:

1. M.-J. Choi, Y.-S. Lee, I. H. Cho, S. S. Kim, D.-H. Kim, S.-N. Kwon and S.-I. Na, *Nano Energy*, 2020, **71**, 104639.
2. D. Koo, Y. Cho, U. Kim, G. Jeong, J. Lee, J. Seo, C. Yang and H. Park, *Advanced Energy Materials*, 2020, **10**, 2001920.
3. Q. Cao, Y. Li, H. Zhang, J. Yang, J. Han, T. Xu, S. Wang, Z. Wang, B. Gao, J. Zhao, X. Li, X. Ma, M. Zakeeruddin Shaik, E. I. Sha Wei, X. Li and M. Grätzel, *Sci Adv*, 2021, **7**, eabg0633.
4. T. Wu, Y. Wang, X. Li, Y. Wu, X. Meng, D. Cui, X. Yang and L. Han, *Advanced Energy Materials*, 2019, **9**, 1803766.
5. R. Garai, M. A. Afroz, R. K. Gupta and P. K. Iyer, *Adv Sustain Syst*, 2020, **4**, 2000078.
6. J. Jiang, X. Lang, Q. Zeng, M. B. Faheem, S. Rong, H. Zhao and Y. Li, *Journal of Materials Chemistry A*, 2021, **9**, 13220-13230.
7. H.-H. Huang, Y.-C. Shih, L. Wang and K.-F. Lin, *Energ Environ Sci*, 2019, **12**, 1265-1273.
8. S. Wu, J. Zhang, Z. Li, D. Liu, M. Qin, S. H. Cheung, X. Lu, D. Lei, S. K. So, Z. Zhu and A. K. Y. Jen, *Joule*, 2020, **4**, 1248-1262.
